# Supplementary material
Source: publisher figshare collection journal article supplement (https://acs.figshare.com/ndownloader/files/5339302)
Supplement: Supplementary file 1 [file 5339302]

 
data_funabiki5a 
 
_audit_creation_method            SHELXL-97 
_chemical_name_systematic 
; 
 ? 
; 
_chemical_name_common             ? 
_chemical_melting_point           ? 
_chemical_formula_moiety          'C14 H18 F9 N O3'  
_chemical_formula_sum 
 'C14 H18 F9 N O3' 
_chemical_formula_weight          419.29 
_chemical_absolute_configuration 'syn'
 
loop_ 
 _atom_type_symbol 
 _atom_type_description 
 _atom_type_scat_dispersion_real 
 _atom_type_scat_dispersion_imag 
 _atom_type_scat_source 
 'C'  'C'   0.0033   0.0016 
 'International Tables Vol C Tables 4.2.6.8 and 6.1.1.4' 
 'H'  'H'   0.0000   0.0000 
 'International Tables Vol C Tables 4.2.6.8 and 6.1.1.4' 
 'F'  'F'   0.0171   0.0103 
 'International Tables Vol C Tables 4.2.6.8 and 6.1.1.4' 
 'N'  'N'   0.0061   0.0033 
 'International Tables Vol C Tables 4.2.6.8 and 6.1.1.4' 
 'O'  'O'   0.0106   0.0060 
 'International Tables Vol C Tables 4.2.6.8 and 6.1.1.4' 
 
_symmetry_cell_setting                 orthorhombic
_symmetry_space_group_name_H-M        'P 21 21 21   '
_symmetry_space_group_name_Hall  'P 2ac 2ab'
_symmetry_Int_Tables_number            19
 
loop_ 
 _symmetry_equiv_pos_as_xyz 
 'x, y, z' 
 '-x+1/2, -y, z+1/2' 
 'x+1/2, -y+1/2, -z' 
 '-x, y+1/2, -z+1/2' 
 
_cell_length_a                    8.811(5) 
_cell_length_b                    12.403(7) 
_cell_length_c                    16.004(9) 
_cell_angle_alpha                 90.00 
_cell_angle_beta                  90.00 
_cell_angle_gamma                 90.00 
_cell_volume                      1749.0(17) 
_cell_formula_units_Z             4 
_cell_measurement_temperature     123(2) 
_cell_measurement_reflns_used           3677
_cell_measurement_theta_min             3.0312
_cell_measurement_theta_max             27.4835
 
_exptl_crystal_description              'Platelet'
_exptl_crystal_colour                   'Colorless'
_exptl_crystal_size_max           0.10 
_exptl_crystal_size_mid           0.10 
_exptl_crystal_size_min           0.05 
_exptl_crystal_density_meas       ? 
_exptl_crystal_density_diffrn     1.592 
_exptl_crystal_density_method     'not measured' 
_exptl_crystal_F_000              856 
_exptl_absorpt_coefficient_mu     0.172 
_exptl_absorpt_correction_type    none 
 
_exptl_special_details 
; 
 ? 
; 
 
_diffrn_ambient_temperature       123(2) 
_diffrn_radiation_wavelength      0.71070 
_diffrn_radiation_type            MoK\a 
_diffrn_radiation_source          'fine-focus sealed tube' 
_diffrn_radiation_monochromator   graphite 
_diffrn_measurement_device_type       'Rigaku/MSC Mercury CCD'
_diffrn_measurement_method             \w
_diffrn_detector_area_resol_mean       14.62
_diffrn_reflns_number             14312 
_diffrn_reflns_av_R_equivalents   0.0808 
_diffrn_reflns_av_sigmaI/netI     0.0525 
_diffrn_reflns_limit_h_min        -11 
_diffrn_reflns_limit_h_max        9 
_diffrn_reflns_limit_k_min        -15 
_diffrn_reflns_limit_k_max        16 
_diffrn_reflns_limit_l_min        -20 
_diffrn_reflns_limit_l_max        15 
_diffrn_reflns_theta_min          3.03 
_diffrn_reflns_theta_max          27.47 
_reflns_number_total              2287 
_reflns_number_gt                 2162 
_reflns_threshold_expression      >2sigma(I) 
 
_computing_data_collection        ? 
_computing_cell_refinement        ? 
_computing_data_reduction         ? 
_computing_structure_solution     'SHELXS-97 (Sheldrick, 1990)' 
_computing_structure_refinement   'SHELXL-97 (Sheldrick, 1997)' 
_computing_molecular_graphics     ? 
_computing_publication_material   ? 
 
_refine_special_details 
; 
 Refinement of F^2^ against ALL reflections.  The weighted R-factor wR and 
 goodness of fit S are based on F^2^, conventional R-factors R are based 
 on F, with F set to zero for negative F^2^. The threshold expression of 
 F^2^ > 2sigma(F^2^) is used only for calculating R-factors(gt) etc. and is 
 not relevant to the choice of reflections for refinement.  R-factors based 
 on F^2^ are statistically about twice as large as those based on F, and R- 
 factors based on ALL data will be even larger. 
; 
 
_refine_ls_structure_factor_coef  Fsqd  
_refine_ls_matrix_type            full 
_refine_ls_weighting_scheme       calc  
_refine_ls_weighting_details 
 'calc w=1/[\s^2^(Fo^2^)+(0.0184P)^2^+4.0296P] where P=(Fo^2^+2Fc^2^)/3' 
_atom_sites_solution_primary      direct 
_atom_sites_solution_secondary    difmap 
_atom_sites_solution_hydrogens    geom 
_refine_ls_hydrogen_treatment     constr 
_refine_ls_extinction_method      none 
_refine_ls_extinction_coef        ? 
_refine_ls_abs_structure_details 
 '' 
_refine_ls_number_reflns          2287 
_refine_ls_number_parameters      248 
_refine_ls_number_restraints      0 
_refine_ls_R_factor_all           0.1052 
_refine_ls_R_factor_gt            0.0965 
_refine_ls_wR_factor_ref          0.1586 
_refine_ls_wR_factor_gt           0.1560 
_refine_ls_goodness_of_fit_ref    1.378 
_refine_ls_restrained_S_all       1.378 
_refine_ls_shift/su_max           0.001 
_refine_ls_shift/su_mean          0.000 
 
loop_ 
 _atom_site_label 
 _atom_site_type_symbol 
 _atom_site_fract_x 
 _atom_site_fract_y 
 _atom_site_fract_z 
 _atom_site_U_iso_or_equiv 
 _atom_site_adp_type 
 _atom_site_occupancy 
 _atom_site_symmetry_multiplicity 
 _atom_site_calc_flag 
 _atom_site_refinement_flags 
 _atom_site_disorder_assembly 
 _atom_site_disorder_group 
N1 N 0.5414(6) 0.6909(4) 0.5096(3) 0.0183(11) Uani 1 1 d . . . 
C1 C 0.5921(7) 0.7868(5) 0.4611(4) 0.0181(13) Uani 1 1 d . . . 
H1 H 0.6943 0.8107 0.4811 0.022 Uiso 1 1 calc R . . 
C2 C 0.6055(8) 0.7396(5) 0.3718(4) 0.0248(15) Uani 1 1 d . . . 
H2A H 0.5771 0.7940 0.3293 0.030 Uiso 1 1 calc R . . 
H2B H 0.7102 0.7145 0.3605 0.030 Uiso 1 1 calc R . . 
C3 C 0.4942(9) 0.6453(5) 0.3714(4) 0.0253(16) Uani 1 1 d . . . 
H3A H 0.3884 0.6709 0.3646 0.030 Uiso 1 1 calc R . . 
H3B H 0.5182 0.5938 0.3261 0.030 Uiso 1 1 calc R . . 
C4 C 0.5174(8) 0.5943(5) 0.4565(4) 0.0192(14) Uani 1 1 d . . . 
H4A H 0.4268 0.5531 0.4744 0.023 Uiso 1 1 calc R . . 
H4B H 0.6072 0.5463 0.4570 0.023 Uiso 1 1 calc R . . 
C5 C 0.5690(8) 0.6856(5) 0.5925(3) 0.0185(13) Uani 1 1 d . . . 
O1 O 0.6069(6) 0.7626(3) 0.6357(3) 0.0233(11) Uani 1 1 d . . . 
O2 O 0.5487(6) 0.5844(3) 0.6206(2) 0.0227(10) Uani 1 1 d . . . 
C6 C 0.5489(8) 0.5590(5) 0.7119(4) 0.0215(14) Uani 1 1 d . . . 
C7 C 0.4196(9) 0.6199(6) 0.7534(4) 0.0305(17) Uani 1 1 d . . . 
H7A H 0.4405 0.6975 0.7516 0.046 Uiso 1 1 calc R . . 
H7B H 0.4101 0.5966 0.8117 0.046 Uiso 1 1 calc R . . 
H7C H 0.3246 0.6049 0.7237 0.046 Uiso 1 1 calc R . . 
C8 C 0.7008(9) 0.5817(7) 0.7502(4) 0.0346(19) Uani 1 1 d . . . 
H8A H 0.7797 0.5438 0.7187 0.052 Uiso 1 1 calc R . . 
H8B H 0.7013 0.5567 0.8083 0.052 Uiso 1 1 calc R . . 
H8C H 0.7205 0.6594 0.7487 0.052 Uiso 1 1 calc R . . 
C9 C 0.5148(10) 0.4391(6) 0.7100(4) 0.0338(19) Uani 1 1 d . . . 
H9A H 0.4153 0.4271 0.6842 0.051 Uiso 1 1 calc R . . 
H9B H 0.5142 0.4107 0.7671 0.051 Uiso 1 1 calc R . . 
H9C H 0.5930 0.4019 0.6773 0.051 Uiso 1 1 calc R . . 
C10 C 0.4793(8) 0.8795(5) 0.4684(4) 0.0185(13) Uani 1 1 d . . . 
H10 H 0.3898 0.8624 0.4324 0.022 Uiso 1 1 calc R . . 
O3 O 0.4265(6) 0.8977(4) 0.5507(3) 0.0267(11) Uani 1 1 d . . . 
H3 H 0.4923 0.8769 0.5851 0.040 Uiso 1 1 calc R . . 
C11 C 0.5476(8) 0.9853(5) 0.4381(4) 0.0214(14) Uani 1 1 d . . . 
F1 F 0.5743(6) 0.9809(3) 0.3541(2) 0.0408(12) Uani 1 1 d . . . 
F2 F 0.6826(5) 1.0042(4) 0.4753(3) 0.0488(13) Uani 1 1 d . . . 
C12 C 0.4517(8) 1.0881(5) 0.4523(4) 0.0204(13) Uani 1 1 d . . . 
F3 F 0.3028(4) 1.0622(3) 0.4406(2) 0.0260(9) Uani 1 1 d . . . 
F4 F 0.4644(5) 1.1208(3) 0.5325(2) 0.0293(10) Uani 1 1 d . . . 
C13 C 0.4876(8) 1.1853(5) 0.3964(4) 0.0217(14) Uani 1 1 d . . . 
F5 F 0.4321(6) 1.1658(3) 0.3198(2) 0.0377(12) Uani 1 1 d . . . 
F6 F 0.6392(5) 1.1963(3) 0.3910(3) 0.0431(12) Uani 1 1 d . . . 
C14 C 0.4229(10) 1.2945(5) 0.4239(4) 0.0278(16) Uani 1 1 d . . . 
F7 F 0.4480(6) 1.3667(3) 0.3647(3) 0.0378(11) Uani 1 1 d . . . 
F8 F 0.4869(7) 1.3292(3) 0.4934(3) 0.0515(15) Uani 1 1 d . . . 
F9 F 0.2751(6) 1.2865(4) 0.4361(3) 0.0474(13) Uani 1 1 d . . . 
 
loop_ 
 _atom_site_aniso_label 
 _atom_site_aniso_U_11 
 _atom_site_aniso_U_22 
 _atom_site_aniso_U_33 
 _atom_site_aniso_U_23 
 _atom_site_aniso_U_13 
 _atom_site_aniso_U_12 
N1 0.026(3) 0.009(2) 0.020(2) 0.0029(19) 0.001(2) 0.000(2) 
C1 0.019(3) 0.014(3) 0.021(3) 0.002(2) 0.003(3) 0.000(3) 
C2 0.035(4) 0.020(3) 0.020(3) 0.004(3) 0.007(3) 0.000(3) 
C3 0.043(4) 0.016(3) 0.017(3) -0.004(2) 0.005(3) 0.003(3) 
C4 0.029(4) 0.016(3) 0.013(3) -0.001(2) -0.003(3) 0.002(3) 
C5 0.020(3) 0.020(3) 0.015(3) 0.003(2) 0.001(3) 0.008(3) 
O1 0.037(3) 0.017(2) 0.016(2) -0.0016(18) -0.0017(19) 0.000(2) 
O2 0.042(3) 0.015(2) 0.0106(18) 0.0042(16) 0.006(2) 0.006(2) 
C6 0.030(4) 0.024(3) 0.011(3) 0.006(2) 0.008(3) 0.004(3) 
C7 0.039(4) 0.037(4) 0.015(3) 0.002(3) 0.006(3) 0.015(4) 
C8 0.039(5) 0.044(5) 0.021(3) 0.010(3) -0.002(3) 0.010(4) 
C9 0.053(5) 0.026(4) 0.023(3) 0.011(3) 0.007(3) 0.010(4) 
C10 0.024(3) 0.015(3) 0.016(3) 0.004(2) 0.000(3) 0.002(3) 
O3 0.033(3) 0.026(2) 0.021(2) 0.0062(19) 0.009(2) 0.009(2) 
C11 0.021(4) 0.019(3) 0.024(3) 0.001(3) -0.001(3) -0.001(3) 
F1 0.069(3) 0.0173(19) 0.036(2) 0.0065(17) 0.027(2) 0.012(2) 
F2 0.019(2) 0.022(2) 0.105(4) 0.011(3) -0.018(2) -0.0032(19) 
C12 0.025(4) 0.017(3) 0.019(3) -0.001(2) 0.002(3) -0.002(3) 
F3 0.019(2) 0.022(2) 0.038(2) 0.0062(17) -0.0042(17) 0.0025(17) 
F4 0.055(3) 0.0174(18) 0.0156(17) 0.0000(14) -0.0069(19) 0.001(2) 
C13 0.028(4) 0.016(3) 0.021(3) 0.001(3) 0.002(3) 0.001(3) 
F5 0.075(3) 0.022(2) 0.0158(18) 0.0008(15) -0.002(2) -0.001(2) 
F6 0.026(2) 0.024(2) 0.080(3) 0.022(2) 0.015(2) -0.001(2) 
C14 0.042(5) 0.008(3) 0.034(4) 0.006(3) -0.008(3) -0.004(3) 
F7 0.062(3) 0.0126(18) 0.038(2) 0.0062(17) 0.001(2) 0.004(2) 
F8 0.096(4) 0.019(2) 0.039(2) -0.0030(19) -0.023(3) -0.004(3) 
F9 0.046(3) 0.028(3) 0.068(3) 0.009(2) 0.014(3) 0.011(2) 
 
_geom_special_details 
; 
 All esds (except the esd in the dihedral angle between two l.s. planes) 
 are estimated using the full covariance matrix.  The cell esds are taken 
 into account individually in the estimation of esds in distances, angles 
 and torsion angles; correlations between esds in cell parameters are only 
 used when they are defined by crystal symmetry.  An approximate (isotropic) 
 treatment of cell esds is used for estimating esds involving l.s. planes. 
; 
 
loop_ 
 _geom_bond_atom_site_label_1 
 _geom_bond_atom_site_label_2 
 _geom_bond_distance 
 _geom_bond_site_symmetry_2 
 _geom_bond_publ_flag 
N1 C5 1.351(7) . ? 
N1 C4 1.484(7) . ? 
N1 C1 1.489(7) . ? 
C1 C10 1.524(9) . ? 
C1 C2 1.549(8) . ? 
C1 H1 1.0000 . ? 
C2 C3 1.526(9) . ? 
C2 H2A 0.9900 . ? 
C2 H2B 0.9900 . ? 
C3 C4 1.515(8) . ? 
C3 H3A 0.9900 . ? 
C3 H3B 0.9900 . ? 
C4 H4A 0.9900 . ? 
C4 H4B 0.9900 . ? 
C5 O1 1.226(7) . ? 
C5 O2 1.345(7) . ? 
O2 C6 1.494(7) . ? 
C6 C8 1.498(10) . ? 
C6 C9 1.518(9) . ? 
C6 C7 1.520(9) . ? 
C7 H7A 0.9800 . ? 
C7 H7B 0.9800 . ? 
C7 H7C 0.9800 . ? 
C8 H8A 0.9800 . ? 
C8 H8B 0.9800 . ? 
C8 H8C 0.9800 . ? 
C9 H9A 0.9800 . ? 
C9 H9B 0.9800 . ? 
C9 H9C 0.9800 . ? 
C10 O3 1.415(7) . ? 
C10 C11 1.524(9) . ? 
C10 H10 1.0000 . ? 
O3 H3 0.8400 . ? 
C11 F2 1.350(8) . ? 
C11 F1 1.366(7) . ? 
C11 C12 1.546(9) . ? 
C12 F4 1.351(7) . ? 
C12 F3 1.364(8) . ? 
C12 C13 1.534(8) . ? 
C13 F5 1.342(7) . ? 
C13 F6 1.346(8) . ? 
C13 C14 1.534(9) . ? 
C14 F8 1.319(8) . ? 
C14 F9 1.320(9) . ? 
C14 F7 1.323(7) . ? 
 
loop_ 
 _geom_angle_atom_site_label_1 
 _geom_angle_atom_site_label_2 
 _geom_angle_atom_site_label_3 
 _geom_angle 
 _geom_angle_site_symmetry_1 
 _geom_angle_site_symmetry_3 
 _geom_angle_publ_flag 
C5 N1 C4 123.3(5) . . ? 
C5 N1 C1 119.8(5) . . ? 
C4 N1 C1 112.9(5) . . ? 
N1 C1 C10 111.5(5) . . ? 
N1 C1 C2 101.7(5) . . ? 
C10 C1 C2 113.9(5) . . ? 
N1 C1 H1 109.8 . . ? 
C10 C1 H1 109.8 . . ? 
C2 C1 H1 109.8 . . ? 
C3 C2 C1 104.1(5) . . ? 
C3 C2 H2A 110.9 . . ? 
C1 C2 H2A 110.9 . . ? 
C3 C2 H2B 110.9 . . ? 
C1 C2 H2B 110.9 . . ? 
H2A C2 H2B 109.0 . . ? 
C4 C3 C2 103.3(6) . . ? 
C4 C3 H3A 111.1 . . ? 
C2 C3 H3A 111.1 . . ? 
C4 C3 H3B 111.1 . . ? 
C2 C3 H3B 111.1 . . ? 
H3A C3 H3B 109.1 . . ? 
N1 C4 C3 101.3(5) . . ? 
N1 C4 H4A 111.5 . . ? 
C3 C4 H4A 111.5 . . ? 
N1 C4 H4B 111.5 . . ? 
C3 C4 H4B 111.5 . . ? 
H4A C4 H4B 109.3 . . ? 
O1 C5 O2 125.1(5) . . ? 
O1 C5 N1 124.4(6) . . ? 
O2 C5 N1 110.5(5) . . ? 
C5 O2 C6 121.6(5) . . ? 
O2 C6 C8 111.2(5) . . ? 
O2 C6 C9 100.7(5) . . ? 
C8 C6 C9 111.7(6) . . ? 
O2 C6 C7 108.7(5) . . ? 
C8 C6 C7 113.4(6) . . ? 
C9 C6 C7 110.3(6) . . ? 
C6 C7 H7A 109.5 . . ? 
C6 C7 H7B 109.5 . . ? 
H7A C7 H7B 109.5 . . ? 
C6 C7 H7C 109.5 . . ? 
H7A C7 H7C 109.5 . . ? 
H7B C7 H7C 109.5 . . ? 
C6 C8 H8A 109.5 . . ? 
C6 C8 H8B 109.5 . . ? 
H8A C8 H8B 109.5 . . ? 
C6 C8 H8C 109.5 . . ? 
H8A C8 H8C 109.5 . . ? 
H8B C8 H8C 109.5 . . ? 
C6 C9 H9A 109.5 . . ? 
C6 C9 H9B 109.5 . . ? 
H9A C9 H9B 109.5 . . ? 
C6 C9 H9C 109.5 . . ? 
H9A C9 H9C 109.5 . . ? 
H9B C9 H9C 109.5 . . ? 
O3 C10 C11 106.8(5) . . ? 
O3 C10 C1 114.0(5) . . ? 
C11 C10 C1 111.6(5) . . ? 
O3 C10 H10 108.1 . . ? 
C11 C10 H10 108.1 . . ? 
C1 C10 H10 108.1 . . ? 
C10 O3 H3 109.5 . . ? 
F2 C11 F1 106.8(6) . . ? 
F2 C11 C10 110.9(5) . . ? 
F1 C11 C10 110.3(5) . . ? 
F2 C11 C12 105.9(5) . . ? 
F1 C11 C12 105.8(5) . . ? 
C10 C11 C12 116.6(5) . . ? 
F4 C12 F3 106.3(5) . . ? 
F4 C12 C13 107.5(5) . . ? 
F3 C12 C13 107.7(5) . . ? 
F4 C12 C11 110.0(5) . . ? 
F3 C12 C11 108.1(5) . . ? 
C13 C12 C11 116.7(5) . . ? 
F5 C13 F6 108.7(5) . . ? 
F5 C13 C12 108.4(5) . . ? 
F6 C13 C12 108.8(5) . . ? 
F5 C13 C14 106.6(5) . . ? 
F6 C13 C14 107.3(6) . . ? 
C12 C13 C14 116.7(5) . . ? 
F8 C14 F9 108.8(7) . . ? 
F8 C14 F7 108.1(5) . . ? 
F9 C14 F7 108.8(6) . . ? 
F8 C14 C13 111.8(6) . . ? 
F9 C14 C13 110.0(6) . . ? 
F7 C14 C13 109.3(6) . . ? 
 
loop_ 
 _geom_torsion_atom_site_label_1 
 _geom_torsion_atom_site_label_2 
 _geom_torsion_atom_site_label_3 
 _geom_torsion_atom_site_label_4 
 _geom_torsion 
 _geom_torsion_site_symmetry_1 
 _geom_torsion_site_symmetry_2 
 _geom_torsion_site_symmetry_3 
 _geom_torsion_site_symmetry_4 
 _geom_torsion_publ_flag 
C5 N1 C1 C10 -82.7(7) . . . . ? 
C4 N1 C1 C10 119.2(6) . . . . ? 
C5 N1 C1 C2 155.6(6) . . . . ? 
C4 N1 C1 C2 -2.6(7) . . . . ? 
N1 C1 C2 C3 26.2(6) . . . . ? 
C10 C1 C2 C3 -93.9(6) . . . . ? 
C1 C2 C3 C4 -40.5(7) . . . . ? 
C5 N1 C4 C3 -179.2(6) . . . . ? 
C1 N1 C4 C3 -21.9(7) . . . . ? 
C2 C3 C4 N1 37.5(7) . . . . ? 
C4 N1 C5 O1 170.9(6) . . . . ? 
C1 N1 C5 O1 15.1(10) . . . . ? 
C4 N1 C5 O2 -9.3(9) . . . . ? 
C1 N1 C5 O2 -165.1(5) . . . . ? 
O1 C5 O2 C6 9.1(10) . . . . ? 
N1 C5 O2 C6 -170.7(5) . . . . ? 
C5 O2 C6 C8 -64.1(8) . . . . ? 
C5 O2 C6 C9 177.4(6) . . . . ? 
C5 O2 C6 C7 61.4(8) . . . . ? 
N1 C1 C10 O3 44.6(7) . . . . ? 
C2 C1 C10 O3 158.9(5) . . . . ? 
N1 C1 C10 C11 165.6(5) . . . . ? 
C2 C1 C10 C11 -80.0(7) . . . . ? 
O3 C10 C11 F2 73.8(7) . . . . ? 
C1 C10 C11 F2 -51.4(7) . . . . ? 
O3 C10 C11 F1 -168.2(5) . . . . ? 
C1 C10 C11 F1 66.6(7) . . . . ? 
O3 C10 C11 C12 -47.5(7) . . . . ? 
C1 C10 C11 C12 -172.7(5) . . . . ? 
F2 C11 C12 F4 -45.2(7) . . . . ? 
F1 C11 C12 F4 -158.3(5) . . . . ? 
C10 C11 C12 F4 78.7(7) . . . . ? 
F2 C11 C12 F3 -160.9(5) . . . . ? 
F1 C11 C12 F3 86.0(6) . . . . ? 
C10 C11 C12 F3 -37.0(7) . . . . ? 
F2 C11 C12 C13 77.6(7) . . . . ? 
F1 C11 C12 C13 -35.5(7) . . . . ? 
C10 C11 C12 C13 -158.5(6) . . . . ? 
F4 C12 C13 F5 -161.4(5) . . . . ? 
F3 C12 C13 F5 -47.2(7) . . . . ? 
C11 C12 C13 F5 74.5(7) . . . . ? 
F4 C12 C13 F6 80.5(7) . . . . ? 
F3 C12 C13 F6 -165.3(5) . . . . ? 
C11 C12 C13 F6 -43.5(7) . . . . ? 
F4 C12 C13 C14 -41.0(8) . . . . ? 
F3 C12 C13 C14 73.2(7) . . . . ? 
C11 C12 C13 C14 -165.1(6) . . . . ? 
F5 C13 C14 F8 -170.9(6) . . . . ? 
F6 C13 C14 F8 -54.6(7) . . . . ? 
C12 C13 C14 F8 67.8(8) . . . . ? 
F5 C13 C14 F9 68.1(7) . . . . ? 
F6 C13 C14 F9 -175.5(5) . . . . ? 
C12 C13 C14 F9 -53.2(8) . . . . ? 
F5 C13 C14 F7 -51.3(7) . . . . ? 
F6 C13 C14 F7 65.1(7) . . . . ? 
C12 C13 C14 F7 -172.6(6) . . . . ? 
 
loop_ 
 _geom_hbond_atom_site_label_D 
 _geom_hbond_atom_site_label_H 
 _geom_hbond_atom_site_label_A 
 _geom_hbond_distance_DH 
 _geom_hbond_distance_HA 
 _geom_hbond_distance_DA 
 _geom_hbond_angle_DHA 
 _geom_hbond_site_symmetry_A 
O3 H3 O1  0.84 1.92 2.681(7) 150.0 . 
 
_diffrn_measured_fraction_theta_max    0.998 
_diffrn_reflns_theta_full              27.47 
_diffrn_measured_fraction_theta_full   0.998 
_refine_diff_density_max    0.290 
_refine_diff_density_min   -0.327 
_refine_diff_density_rms    0.072 
